# Supplementary material for: Aqueous medium-induced micropore formation in plasma polymerized polystyrene: an effective route to inhibit bacteria adhesion
Source: Royal Society of Chemistry journal article supplement (doi:10.1039/c7tb02964k), 2018-01-01
Supplement: c7tb02964k1.pdf [file c7tb02964k1.pdf]

## Supporting Information

### **Aqueous medium-induced micropore formation in plasma polymerized polystyrene: An effective route to inhibit bacteria adhesion**

Roxana Jijie,<sup>1,2</sup> Alexandre Barras,<sup>2</sup> Teodora Teslaru,<sup>1</sup> Ionut Topala,<sup>1</sup> Valentin Pohoata,<sup>1</sup> Marius Dobromir,<sup>1</sup> Tetiana Dumych,<sup>3</sup> Julie Boukaert,<sup>3</sup> Sabine Szunerits,<sup>2</sup> Nicoleta Dumitrascu<sup>1</sup> and Rabah Boukherroub<sup>2\*</sup>

*<sup>1</sup>Iasi Plasma Advanced Research Center (IPARC), Faculty of Physics, Alexandru Ioan Cuza University of Iasi, Bd. Carol I No. 11, Iasi 700506, Romania*

*<sup>2</sup>Univ. Lille, CNRS, Centrale Lille, ISEN, Univ. Valenciennes, UMR 8520 - IEMN, F-59000 Lille, France*

*<sup>3</sup>Unité de Glycobiologie Structurale et Fonctionnelle (UGSF), Université Lille 1, CNRS UMR 8576, 59655 Villeneuve d'Ascq, France*

---

\*To whom correspondence should be addressed: [rabah.boukherroub@univ-lille1.fr](mailto:rabah.boukherroub@univ-lille1.fr)

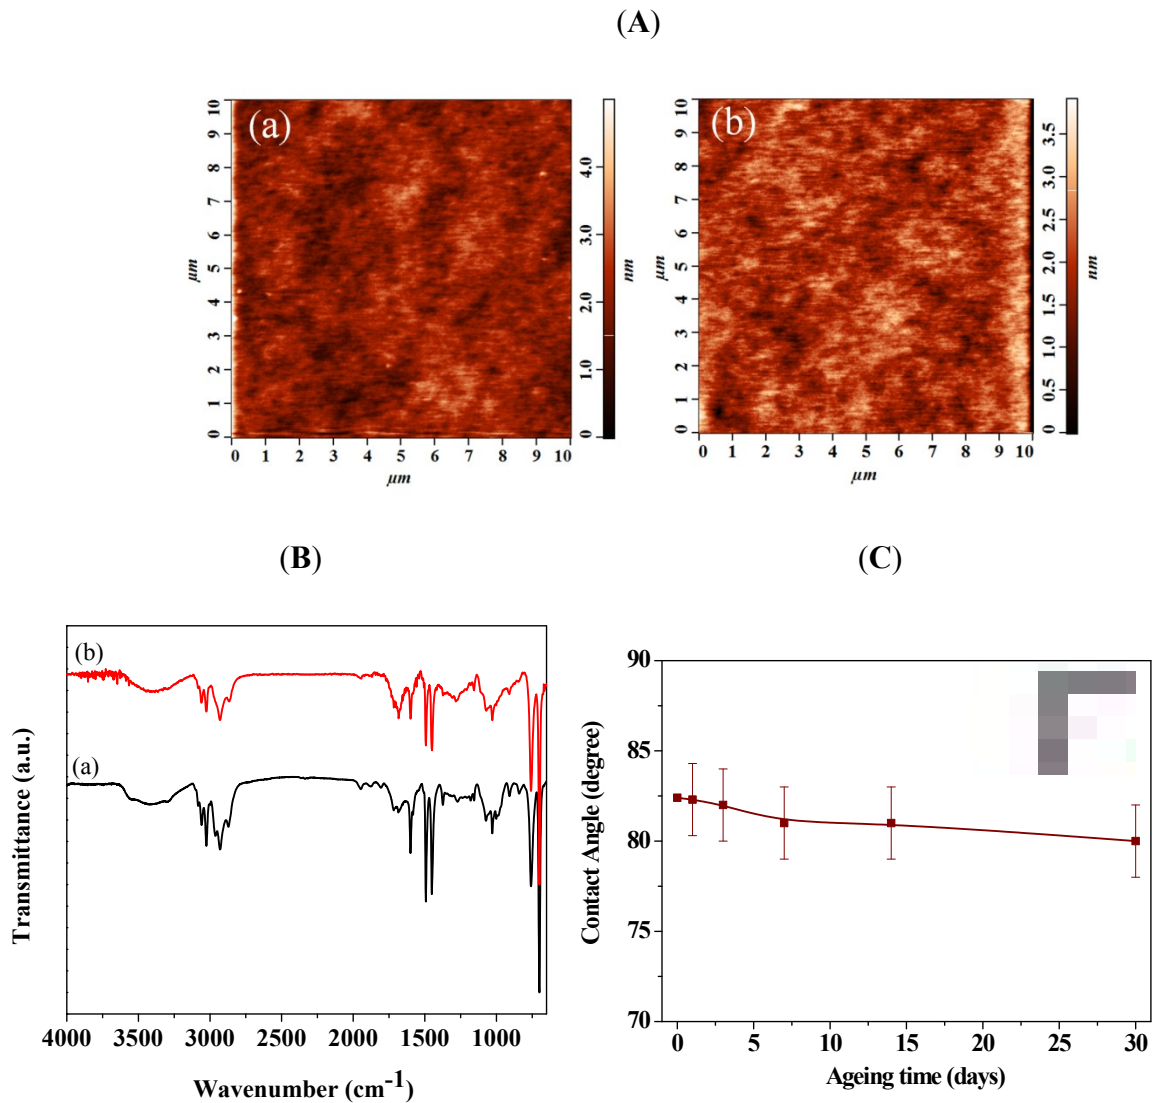

**Figure S1.** The stability of pPS film in air characterized by (A) AFM, (B) FTIR spectroscopy and (C) WCA measurements. The AFM topographic images were scanned over  $10 \times 10 \mu\text{m}^2$  and the FTIR spectra were recorded on (a) as deposited pPS film and (b) after 30 days of storage in ambient air.

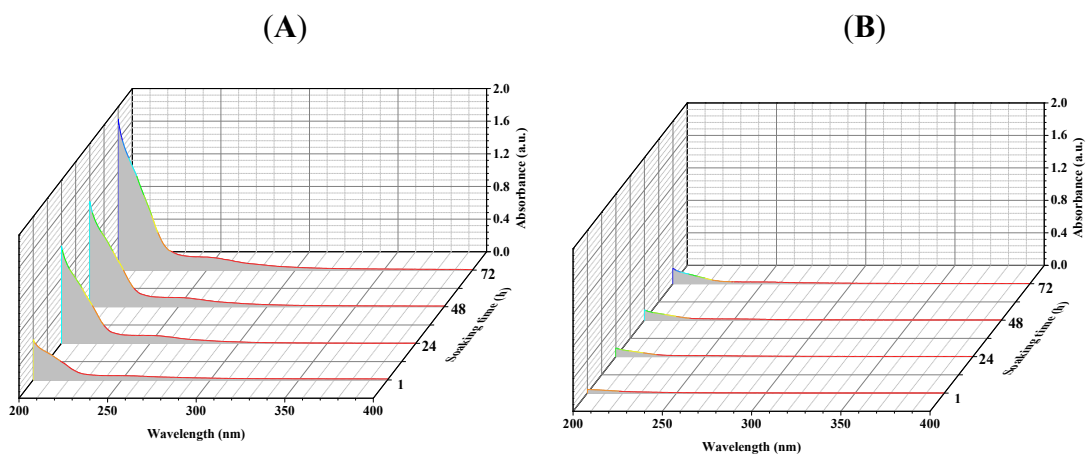

**Figure S2.** The kinetics of the (A) as-deposited and (B) air-aged pPS films dissolution.

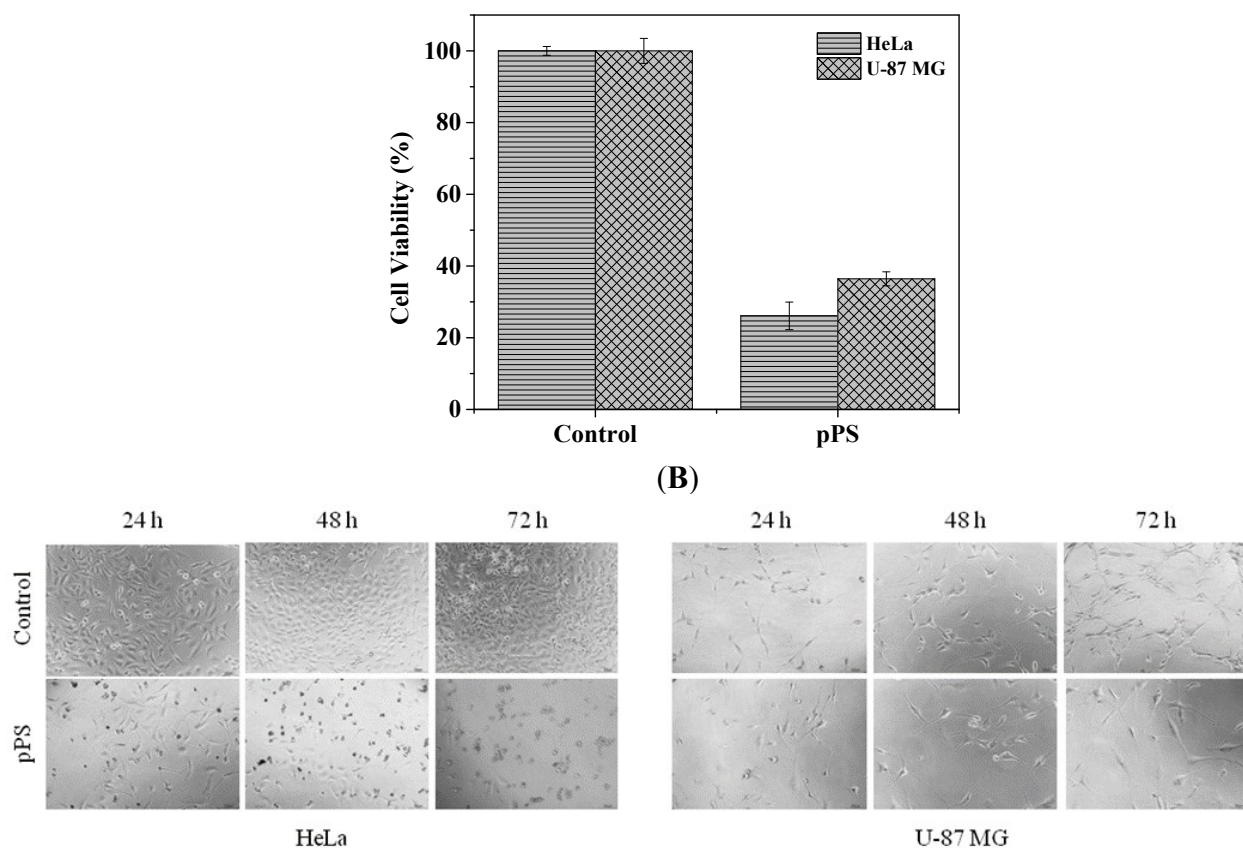

**Figure S3.** (A) Relative cell viability and (B) phase contrast images (×10) of HeLa and U-87 MG cells over a period of 3 days culture in DMEM (Control) and DMEM containing low cross-linked oligomers extracted from pPS matrix (pPS).

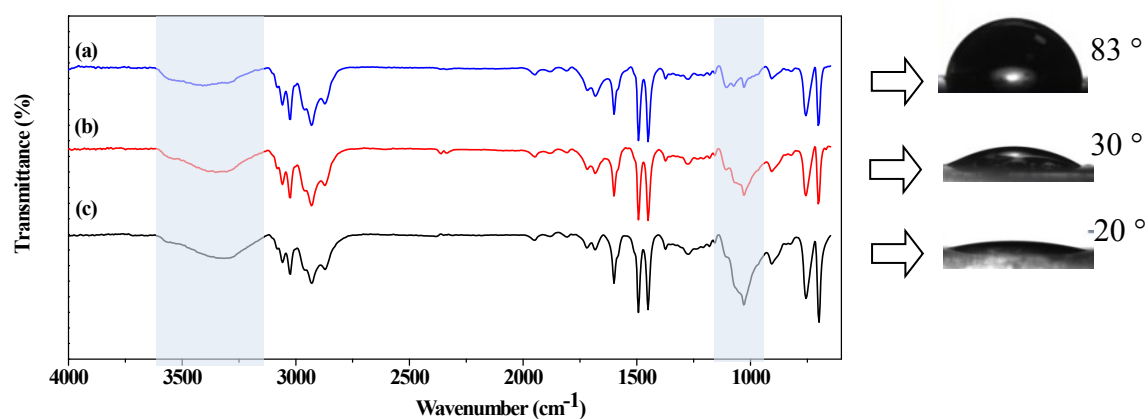

**Figure S4.** FTIR spectra of pPS film previously immersed in Milli-Q water for 72 h (a) and after immersion in dopamine solution for 1 h (b) and 4 h (c). The right images correspond to the WCA values of the surfaces.
